# Supplementary material for: Outstanding anti-corrosion performance in Nd–Fe–B permanent magnets by constructing a hydrophobic triplex surface coating
Source: Royal Society of Chemistry journal article supplement (doi:10.1039/d3tc01104f), 2023-01-01
Supplement: d3tc01104f1.pdf [file d3tc01104f1.pdf]

## Supplementary information

### **Outstanding anti-corrosion performance in Nd–Fe–B permanent magnet by constructing a hydrophobic triplex surface coating**

Wang Chen,<sup>a</sup> Jiaying Jin,<sup>a,\*</sup> Junyao Yu,<sup>a</sup> Liang Zhou,<sup>a</sup> Baixing Peng,<sup>a</sup> Song Fu,<sup>b</sup>

Xiaolian Liu,<sup>b</sup> Guohua Bai,<sup>b</sup> and Mi Yan<sup>a,\*</sup>

<sup>a</sup>*School of Materials Science and Engineering, State Key Laboratory of Silicon Materials, Key Laboratory of Novel Materials for Information Technology of Zhejiang Province, Zhejiang University, Hangzhou 310027, China*

<sup>b</sup>*Institute of Advanced Magnetic Materials, College of Materials and Environmental Engineering, Hangzhou Dianzi University, Hangzhou 310012, China*

*\*Corresponding authors. jinjy@zju.edu.cn (J. Jin), mse\_yanmi@zju.edu.cn (M. Yan).*

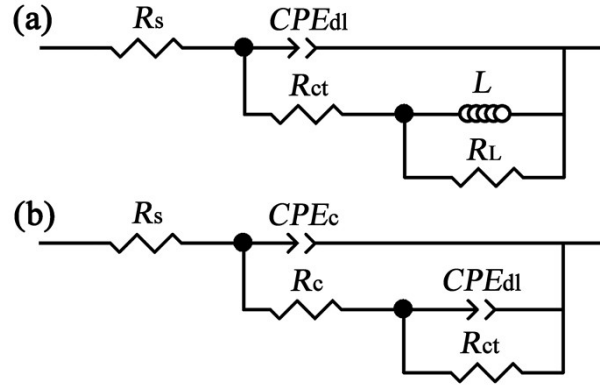

**Fig. S1.** Electrochemical equivalent circuit for (a) pristine and (b) oxidized Nd–Fe–B magnets in the impedance measurement.  $R_s$  is the solution resistance,  $R_{ct}$  is the charge transfer resistance,  $R_c$  is the film resistance, and  $R_L$  is the inductive reactance.  $CPE_{dl}$  and  $CPE_c$  reflect the double-layer capacitance and the film capacitance, respectively.

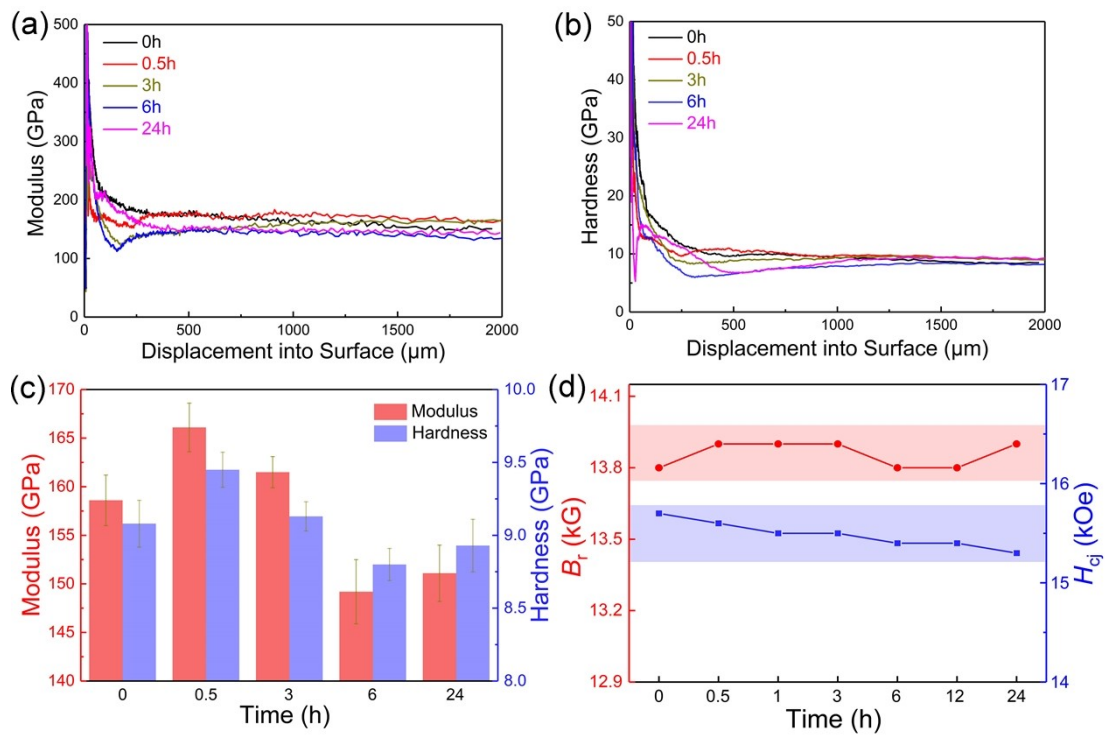

**Fig. S2.** Mechanical and magnetic properties of the pristine and oxidized Nd–Fe–B magnets. (a) Modulus curves, (b) hardness curves, and (c) derived mechanical values. (d) Remanence  $B_r$  (red) and coercivity  $H_{cj}$  (blue) variations as a function of oxidation time.

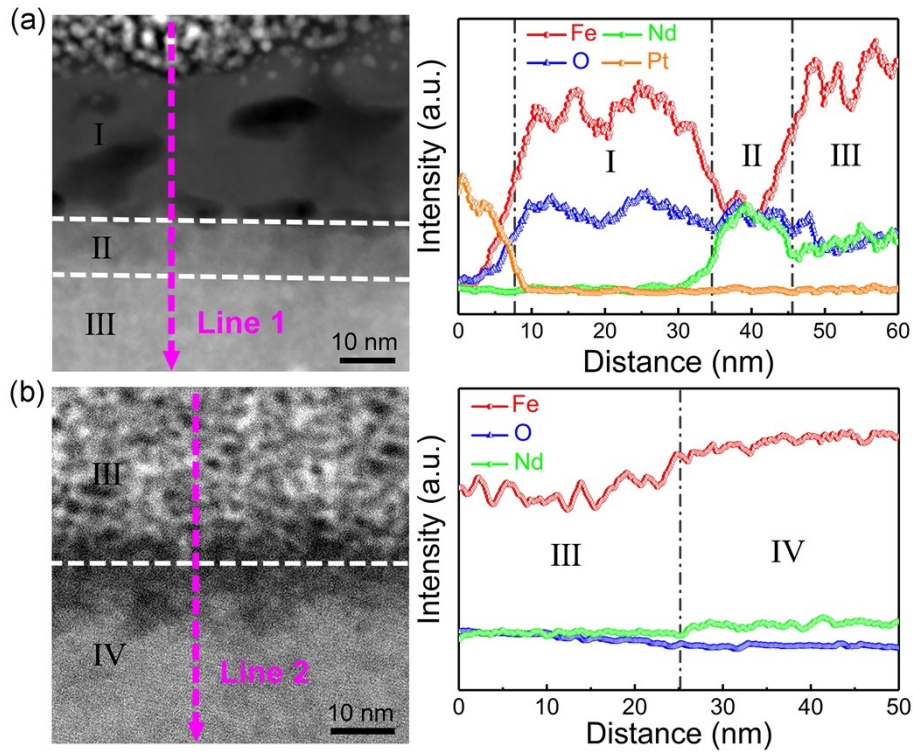

**Fig. S3.** HAADF-STEM image and corresponding elemental scan profiles of (a) Line 1 recorded from region A, and (b) Line 2 recorded from region B in **Fig. 5a**.

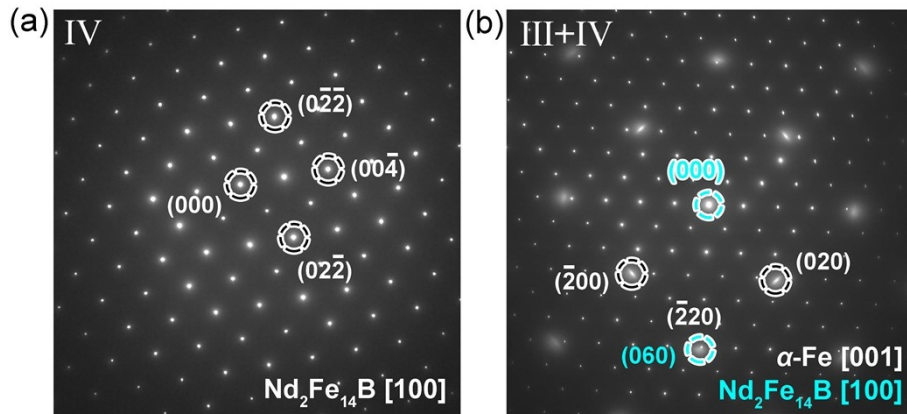

**Fig. S4.** Crystallographic orientation relationship between zone III and zone IV taken from **Fig. 5**. (a) SAED pattern of  $\text{Nd}_2\text{Fe}_{14}\text{B}$  grain in zone IV along the  $[100]$  axis. (b) SAED pattern of the III/IV interface region, demonstrating the Burgers orientation relationship of  $[001]_{\alpha\text{-Fe}}//[100]_{\text{Nd}_2\text{Fe}_{14}\text{B}}$  and  $(\bar{2}20)_{\alpha\text{-Fe}}//(\bar{0}60)_{\text{Nd}_2\text{Fe}_{14}\text{B}}$ .

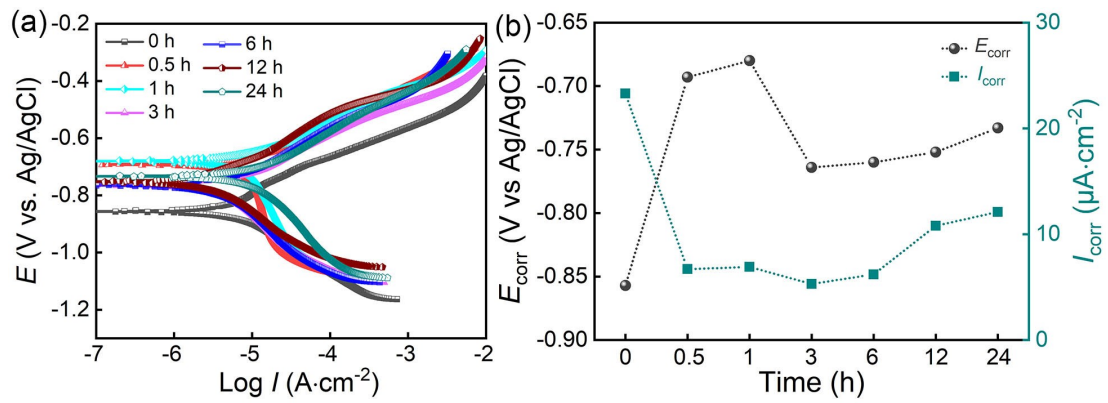

**Fig. S5.** Anti-corrosion performance of proof-of-principle Dy50 Nd–Dy–Fe–B magnet with a nominal composition of  $[(\text{Pr}_{20}\text{Nd}_{80})_{0.5}\text{Dy}_{0.5}]_{31.0}\text{Fe}_{\text{bal}}\text{M}_{1.25}\text{B}_{1.0}$  ( $\text{M} = \text{Co}, \text{Al}, \text{Cu}, \text{Ga}, \text{Zr}, \text{wt.}\%$ ). (a) Electrochemical polarization curves of the pristine and oxidized Dy50 magnets in 3.5 wt.% NaCl solution, (b) derived corrosion potential ( $E_{\text{corr}}$ ) and corrosion current density ( $I_{\text{corr}}$ ).

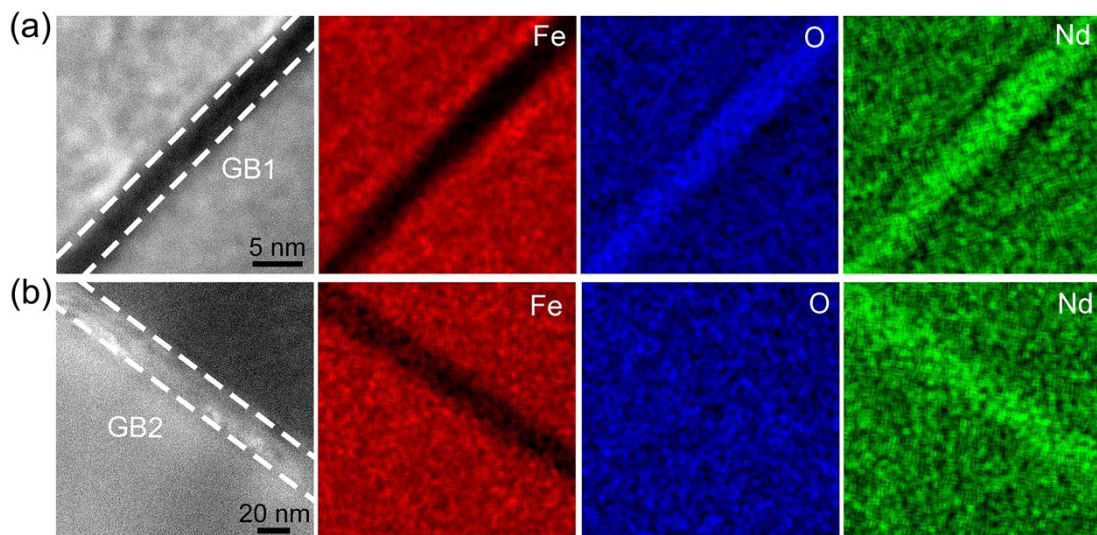

**Fig. S6.** HAADF-STEM image and corresponding STEM-EDS mappings for (a) GB1 and (b) GB2 obtained from zone III and zone IV in **Fig. 6a**, respectively.

**Table S1.** Electrochemical parameters of the pristine and oxidized Nd–Fe–B magnets in 3.5 wt.% NaCl solution.

| Samples | $E_{\text{corr}}$<br>(V) | $I_{\text{corr}}$<br>( $\mu\text{A}\cdot\text{cm}^{-2}$ ) | $R_s$<br>( $\Omega\cdot\text{cm}^2$ ) | $Q_c$<br>( $\text{F}\cdot\text{cm}^{-2}\cdot\text{s}^{n_c}$ ) | $n_c$ | $R_c$<br>( $\Omega\cdot\text{cm}^2$ ) | $Q_{\text{dl}}$<br>( $\text{F}\cdot\text{cm}^{-2}\cdot\text{s}^{n_{\text{dl}}}$ ) | $n_{\text{dl}}$ | $R_{\text{ct}}$<br>( $\Omega\cdot\text{cm}^2$ ) | $L$<br>( $\text{H}\cdot\text{cm}^2$ ) | $R_L$<br>( $\Omega\cdot\text{cm}^2$ ) |
|---------|--------------------------|-----------------------------------------------------------|---------------------------------------|---------------------------------------------------------------|-------|---------------------------------------|-----------------------------------------------------------------------------------|-----------------|-------------------------------------------------|---------------------------------------|---------------------------------------|
| 0 h     | -0.93                    | 27.3                                                      | 47.0                                  | /                                                             | /     | /                                     | $1.82\times 10^{-4}$                                                              | 0.790           | 1528                                            | 1645                                  | 551                                   |
| 0.5 h   | -0.86                    | 4.7                                                       | 56.1                                  | $3.53\times 10^{-4}$                                          | 0.757 | 16.3                                  | $6.23\times 10^{-9}$                                                              | 0.745           | 4580                                            | /                                     | /                                     |
| 1 h     | -0.86                    | 5.6                                                       | 53.9                                  | $3.76\times 10^{-4}$                                          | 0.804 | 23.1                                  | $1.50\times 10^{-11}$                                                             | 0.723           | 2885                                            | /                                     | /                                     |
| 3 h     | -0.85                    | 4.8                                                       | 57.2                                  | $3.36\times 10^{-4}$                                          | 0.797 | 25.0                                  | $6.40\times 10^{-12}$                                                             | 0.730           | 2678                                            | /                                     | /                                     |
| 6 h     | -0.74                    | 18.4                                                      | 63.5                                  | $4.91\times 10^{-4}$                                          | 0.823 | 65.0                                  | $7.84\times 10^{-11}$                                                             | 0.826           | 2577                                            | /                                     | /                                     |
| 12 h    | -0.75                    | 24.9                                                      | 56.6                                  | $2.34\times 10^{-4}$                                          | 0.751 | 107.6                                 | $1.03\times 10^{-4}$                                                              | 0.704           | 2456                                            | /                                     | /                                     |
| 24 h    | -0.77                    | 22.7                                                      | 63.4                                  | $2.47\times 10^{-4}$                                          | 0.841 | 395.6                                 | $1.13\times 10^{-4}$                                                              | 0.873           | 1682                                            | /                                     | /                                     |
